# Supplementary material for: Identification of FactorsInfluencing the Puumala Virus Seroprevalence within Its Reservoir in aMontane Forest Environment
Source: Viruses. 2014 Oct 23;6(10):3944–67. doi: 10.3390/v6103944 (PMC4213572; doi:10.3390/v6103944)
Supplement: Supplementary File 1 [file viruses-06-03944-s001.pdf]

## Supplementary Materials

### Identification of Factors Influencing the Puumala Virus Seroprevalence within Its Reservoir in a Montane Forest Environment

Bryan R. Thoma, Jörg Müller, Claus Bässler, Enrico Georgi, Anja Osterberg, Susanne Schex, Christian Bottomley and Sandra S. Essbauer

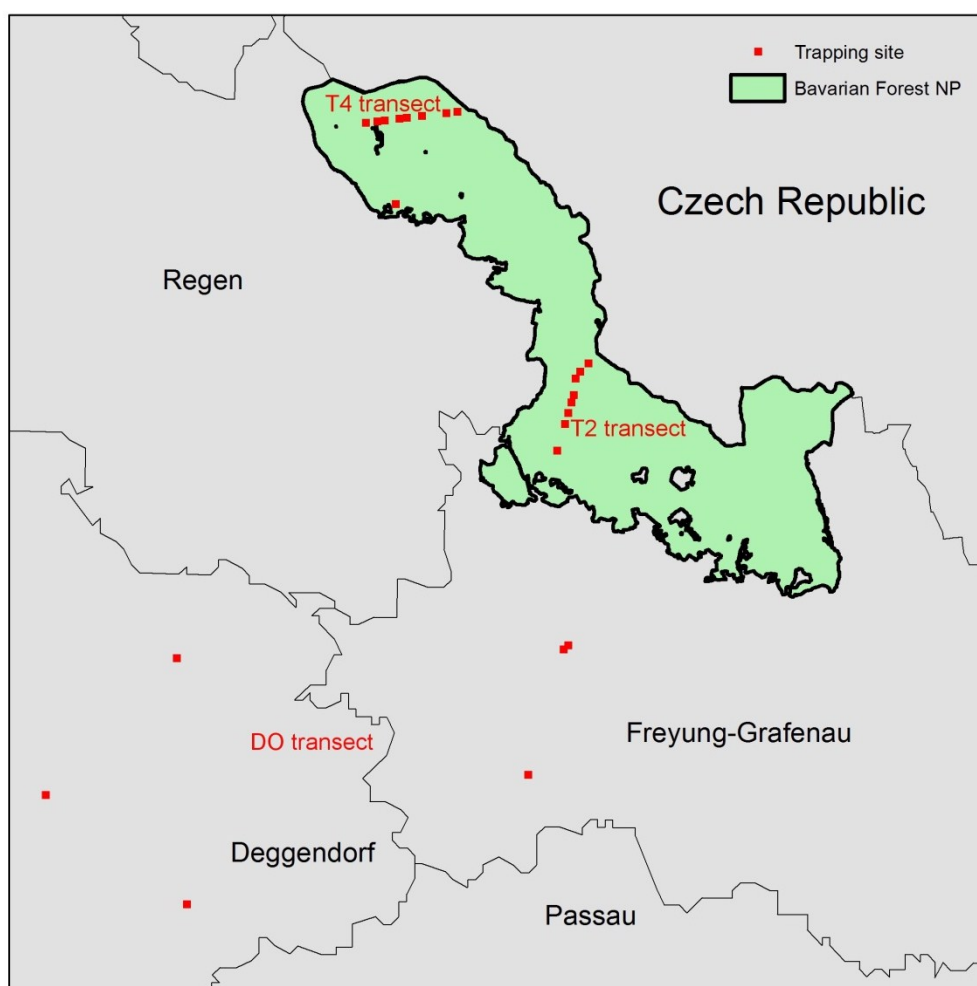

**Supplementary Figure S1.** Trapping sites along three transects in the BFNP.

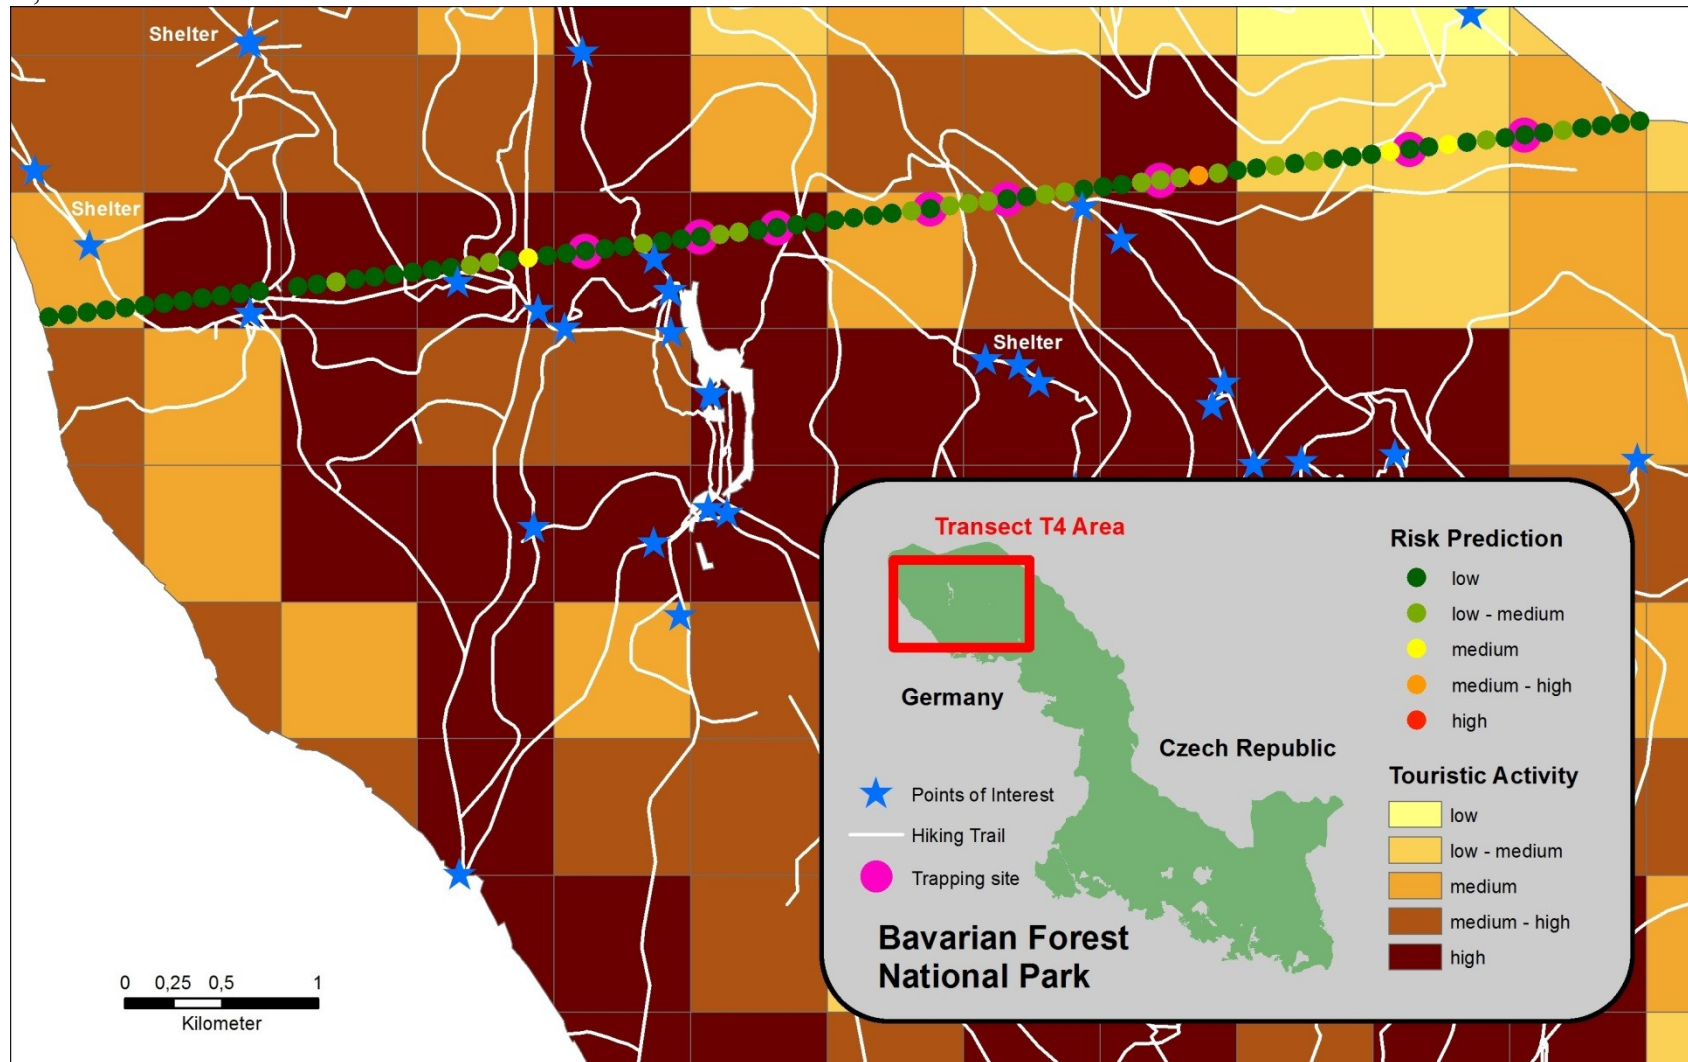

**Supplementary Figure S2.** Illustrative risk prediction map for PUUV in bank voles at transect T4.
